# Supplementary material
Source: MDPI journal article supplement (https://www.mdpi.com/2076-3417/10/24/9093)
Supplement: s1 [file s1]

**Supplemental Material 1 to**  
**Theoretical analysis of fractional viscoelastic flow in circular**  
**pipes: general solutions**

Dmitry Gritsenko\*

*Department of Mechanical and Industrial Engineering,  
University of Illinois at Chicago, Chicago, IL 60607, USA*

Roberto Paoli

*Department of Mechanical and Industrial Engineering,  
University of Illinois at Chicago, Chicago, IL 60607, USA and  
Computational Science Division and Leadership Computing Facility,  
Argonne National Laboratory, Lemont, IL 60439, USA*

(Dated: November 26, 2020)

---

\* dgrits2@uic.edu

Here we compare velocity profiles in a circular pipe for Newtonian and fractional Maxwell fluids. Fractional Maxwell fluid dynamics is described by two fractional orders,  $\alpha$  and  $\beta$ . For Newtonian fluid  $\alpha = 1$ ,  $\beta = 1$ . In animations S1-S4 velocity profile for Newtonian fluid is shown in red, while those for fractional Maxwell fluid are given in green. For all fractional Maxwell fluid velocity profiles  $\alpha = 1$ , while  $\beta = 0.2, 0.4, 0.6, 0.8$  for S1-S4, respectively. For all animations  $\omega_0 \equiv \tilde{\omega}$  and  $\tilde{\omega} = 0 \dots 1000$ .
